# Supplementary material for: Fluid and Bubble Flow Detach Adherent Cancer Cells to Form Spheroids on a Random Positioning Machine
Source: MDPI journal article supplement (doi:10.3390/cells12222665), 2023-11-20
Supplement: s1 [file s1]

**A**

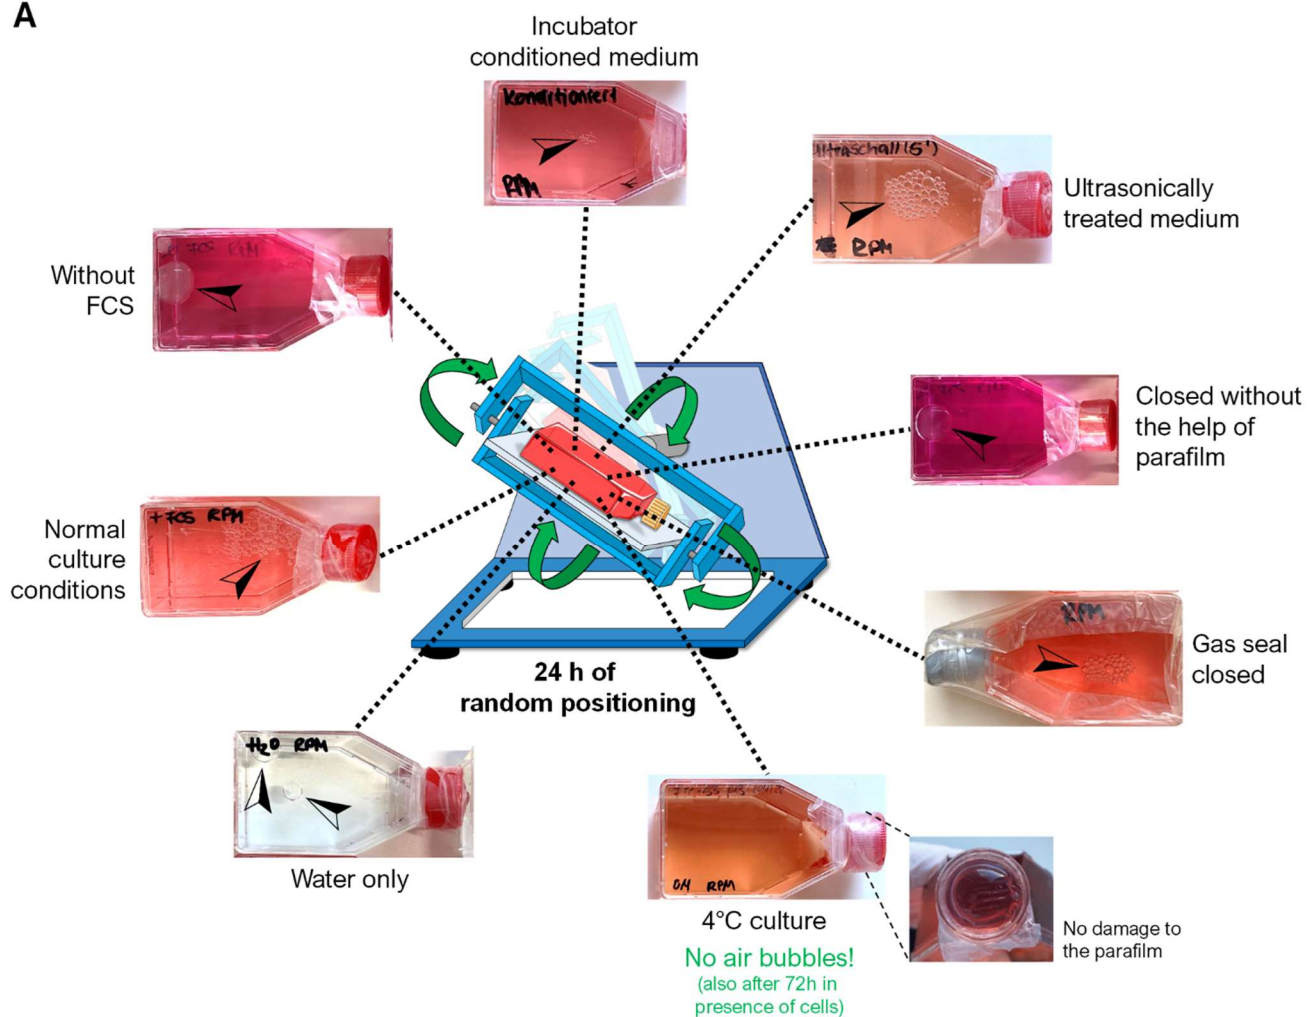

**B**

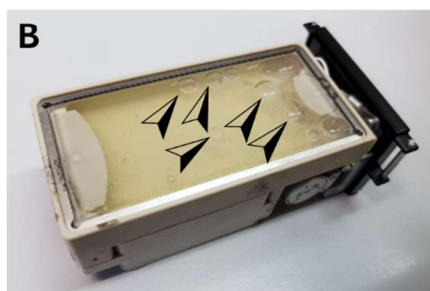

**Figure S1.** Occurrence of air bubbles under different cell culture conditions and handling of cell culture flasks. **(A)** Bubble formation (indicated by black arrows) in bubble-free filled T25 cell culture flasks after 24 h of random positioning under different conditions (without cells). **(B)** Flight container of the CellBox-2 experiment after its return from the ISS. Parts of the figure were drawn by using pictures from Servier Medical Art.

**Table S1.** Antibodies used for immunofluorescence analyses.

| <b>Antibody (anti-...)</b> | <b>Company, Product Nr.</b> |  | <b>Species</b> | <b>Dilution IF</b> |
|----------------------------|-----------------------------|--|----------------|--------------------|
| $\beta$ -catenin           | Invitrogen, #71-2700        |  | Rabbit         | 1:100              |
| p38 MAPK $\alpha$          | Invitrogen, #MA5-15116      |  | Mouse          | 1:1000             |
| MRTF-A/MKL1                | Santa-Cruz, #sc-390324      |  | Rabbit         | 1:100              |
| NF $\kappa$ B p65 (RelA)   | Invitrogen, #510500         |  | Mouse          | 1:500              |
| YAP1                       | Sigma-Aldrich, #WH0010413M1 |  | Mouse          | 1:1000             |

  

| <b>Secondary antibody</b> | <b>Labelling</b> | <b>Company, Product Nr.</b> | <b>Dilution</b>             |
|---------------------------|------------------|-----------------------------|-----------------------------|
| anti-Mouse                | AF488            | Invitrogen, #A1101          | 1:1000                      |
|                           | AF647            | Invitrogen, #A21235         | 1:1000<br>for MRTF-A: 1:500 |
| anti- Rabbit              | AF488            | Invitrogen, #A11008         | 1:1000                      |
|                           | AF647            | Invitrogen, #A21244         | 1:500                       |

AF, Alexa Fluor; IF, immunofluorescence.

**Table S2.** Primer sequences for quantitative real-time PCR.

| Gene               | Primer Name | Sequence (5'→3')            |
|--------------------|-------------|-----------------------------|
| <i>18S rRNA</i>    | 18S-F       | ggAgCCTgCggCTTAATTT         |
|                    | 18S-R       | CAACTAAgAACggCCATgCA        |
| <i>ANKRD1</i>      | ANKRD1-F    | AgCgCCCgAgATAAgTTgC         |
|                    | ANKRD1-R    | gTCTgCCTCACAggCgATAA        |
| <i>CAV1</i>        | CAV1-F      | CCACgggCCAgCATgT            |
|                    | CAV1-R      | gCCTTgTTgTTgggCTTgTAg       |
| <i>CCN2 (CTGF)</i> | CTGF-F      | ACAAGggCCTCTTCTgTgACTT      |
|                    | CTGF-R      | ggTACACCgTACCACCgAAgAT      |
| <i>CXCL8</i>       | IL8-F       | TggCAgCCTTCCTgATTTCT        |
|                    | IL8-R       | gggTggAAAgTTTggAgTATg       |
| <i>FN1</i>         | FN1-F       | AgATCTACCTgTACACCTTgAATgACA |
|                    | FN1-R       | CATgATACCAgCAAggAATTgg      |
| <i>ICAM1</i>       | ICAM1-F     | CggCTgACgTgTgCAgTAAT        |
|                    | ICAM1-R     | CTTCTgAgACCTCTggCTTCgT      |
| <i>IL6</i>         | IL6-F       | CgggAACgAAAgAgAAgCTCTA      |
|                    | IL6-R       | gAgCAgCCCCAgggAgAA          |
| <i>KRT8</i>        | KRT8-F      | gATCTCTgAgATgAACCggAACA     |
|                    | KRT8-R      | gCTCggCATCTgCAATgg          |
| <i>SNAI1</i>       | SNAI1-F     | CCAgTgCCTCgACCACTATg        |
|                    | SNAI1-R     | CTgCTggAAggTAAACTCTggA      |
| <i>VCL</i>         | VCL-F       | gTCCACCAgCCCTgTCATTT        |
|                    | VCL-R       | gTCTCggCTgCTCgTATCTT        |
| <i>VEGFA</i>       | VEGFA-F     | CTACCTCCACCATgCCAAgTg       |
|                    | VEGFA-R     | gCgCTgATAgACATCCATgAAC      |
